# Supplementary material for: Eriodictyol suppresses Th17 differentiation and the pathogenesis of experimental autoimmune encephalomyelitis
Source: Royal Society of Chemistry journal article supplement (doi:10.1039/c9fo03019k), 2020-01-01
Supplement: c9fo03019k1.pdf [file c9fo03019k1.pdf]

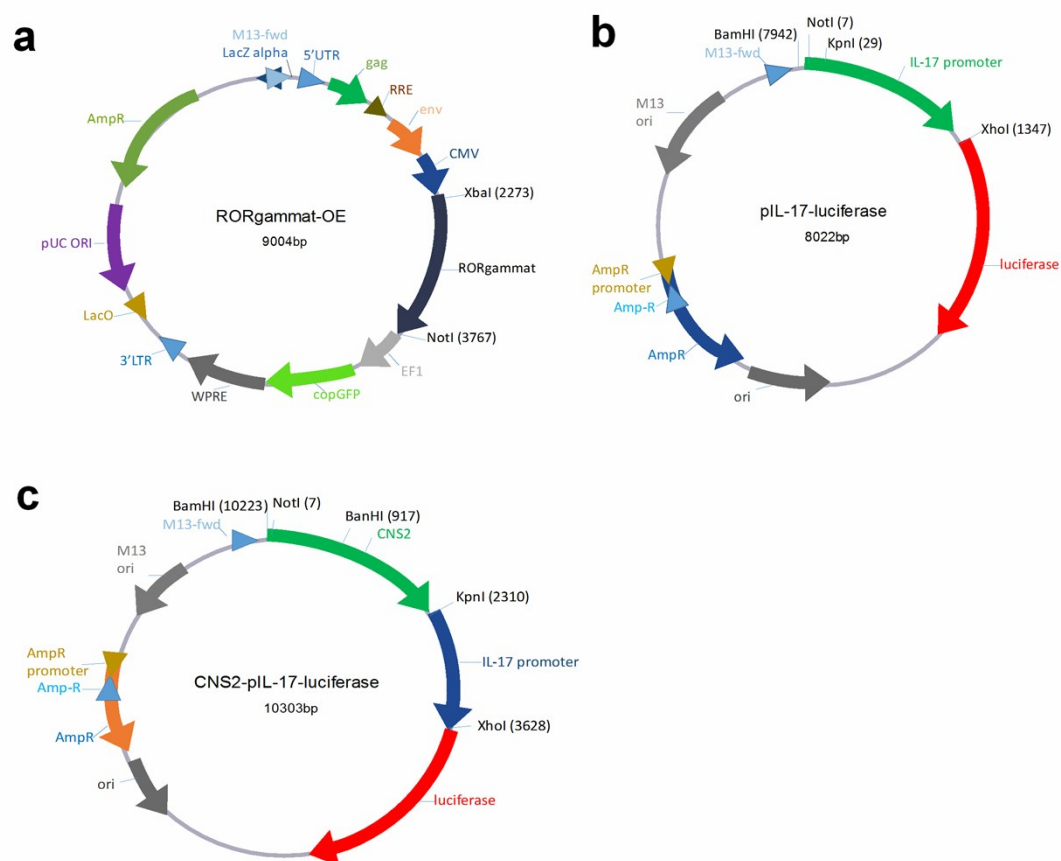

**Figure S1.** (a) mROR $\gamma$ t overexpressed vector. (b) pIL-17-luciferase vector. (c) CNS2-pIL-17-luciferase vector.

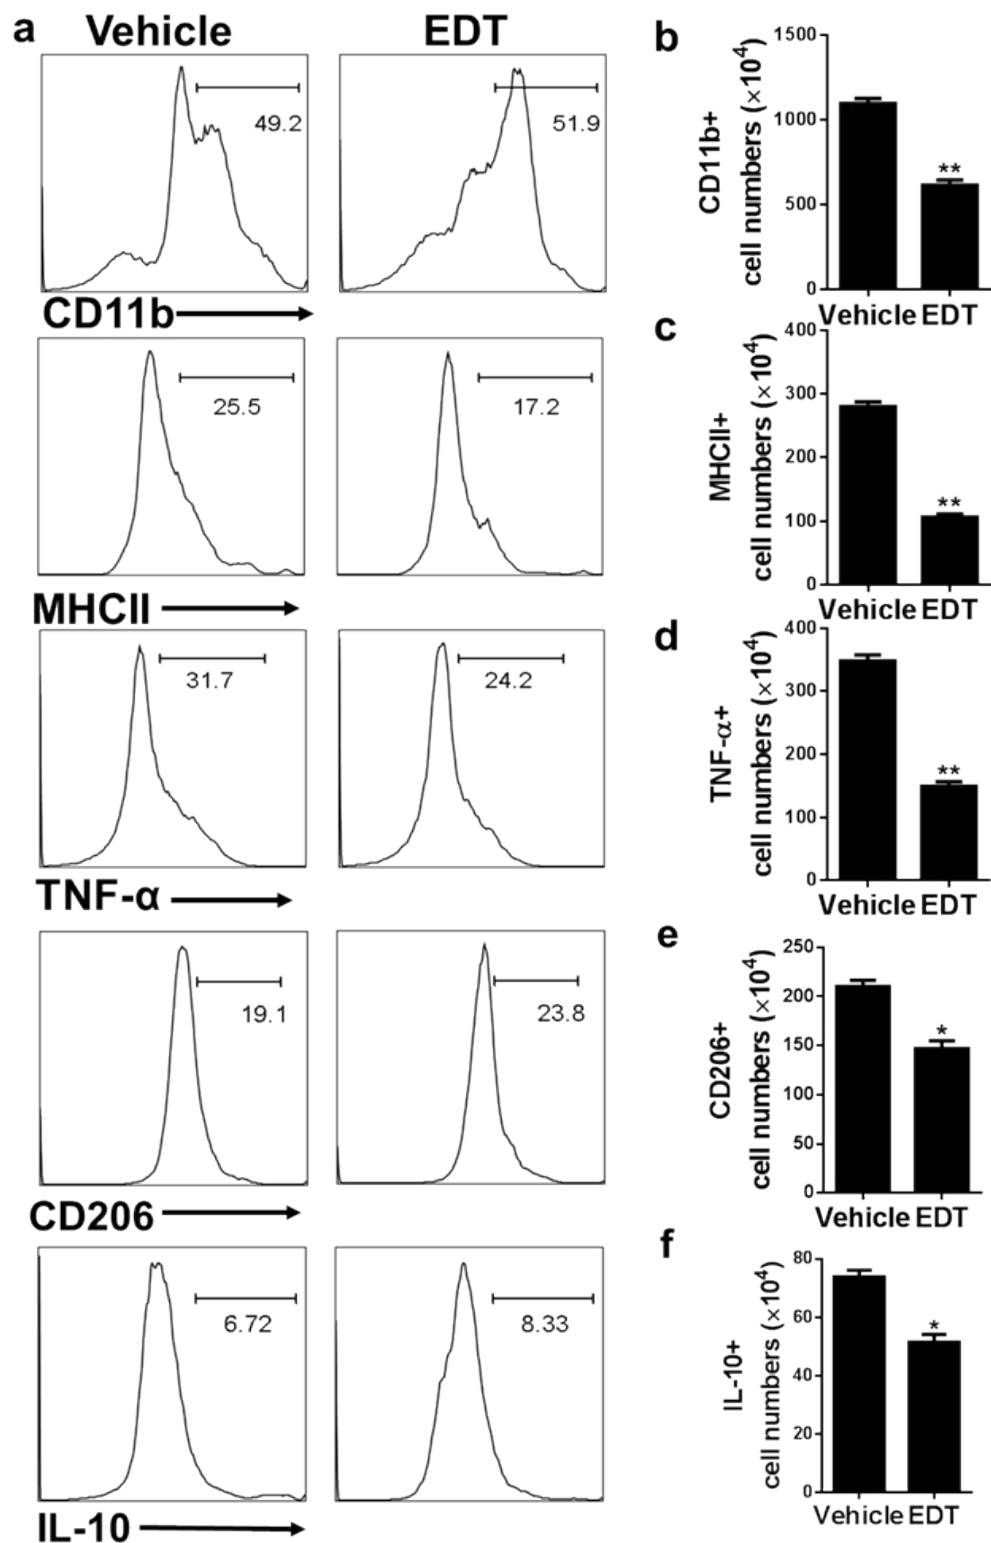

**Figure S2. EDT affects a Switch from M1 to M2 Phenotype of Microglia in the CNS.** MNCs were harvested as described in Fig.5. (a) The expression of CD11b, MHC II, TNF-α, CD206, IL-10 (The positive cells of MHC II, TNF-α, CD206 and IL-10 are

gated from the CD11b positive cells) was measured by flow cytometry. (b-f) Percentages of each molecule were counted. Symbols represent mean  $\pm$  SEM (n = 5 each group). \*\*  $p < 0.01$ . Student's t-test. One representative of three independent experiments is shown.

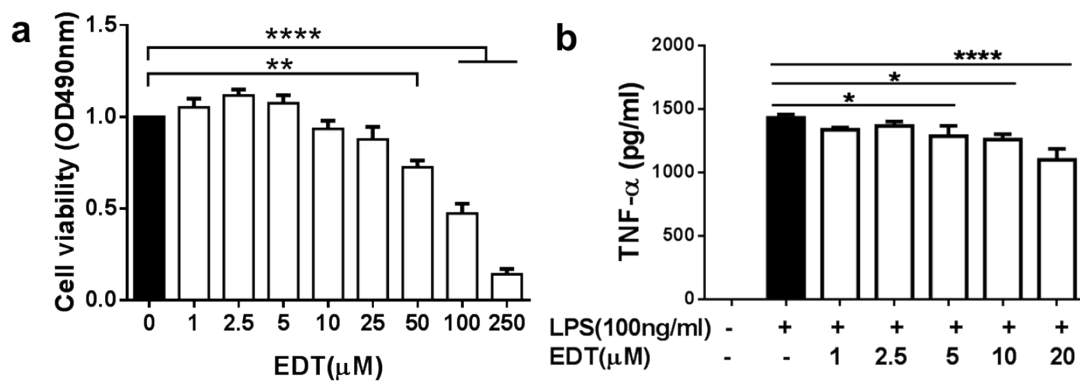

**Figure S3. EDT reduces TNF- $\alpha$  expression in BMDCs.** (a) BMDCs were cultured with different concentrations (1-250  $\mu$ M) of EDT for 18 h. Cell viability was determined by MTS at 490 nm. (b) BMDCs were generated and activated with 100 ng/ $\mu$ l LPS, and supernatants were assayed by ELISA for production of TNF- $\alpha$ . Symbols represent mean  $\pm$  SEM (n = 3 each group). \* $p < 0.05$ , \*\*  $p < 0.01$ , \*\*\*\*  $p < 0.0001$ . Student's t-test. One representative of three independent experiments is shown.

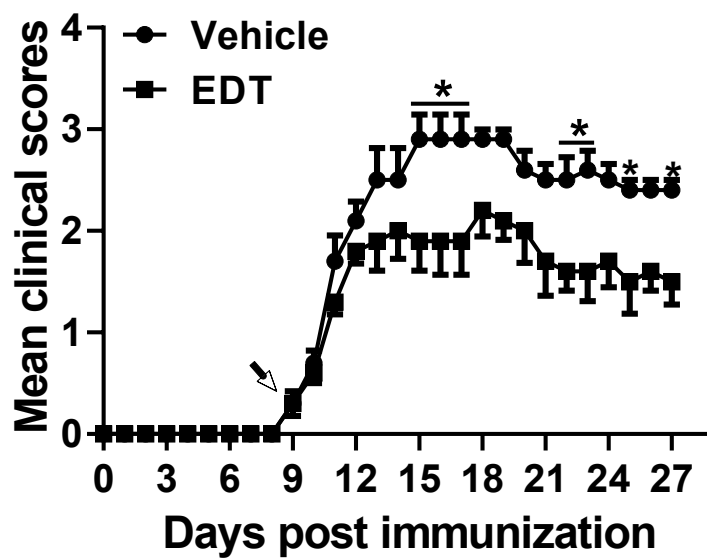

**Figure S4. EDT Effectively Enhanced Clinical Recovery from EAE.** Female, 8–10 weeks-old C57BL/6 mice were immunized with MOG<sub>35–55</sub> and treated with vehicle or EDT (40 mg/kg/day) daily starting at day 9 p.i. (disease onset), indicated by the arrow. Disease was scored daily on a 0–5 scale. Symbols represent mean  $\pm$  SEM (n = 5 each group) \*  $p < 0.05$ , determined by two-way ANOVA. One representative of three independent experiments is shown.

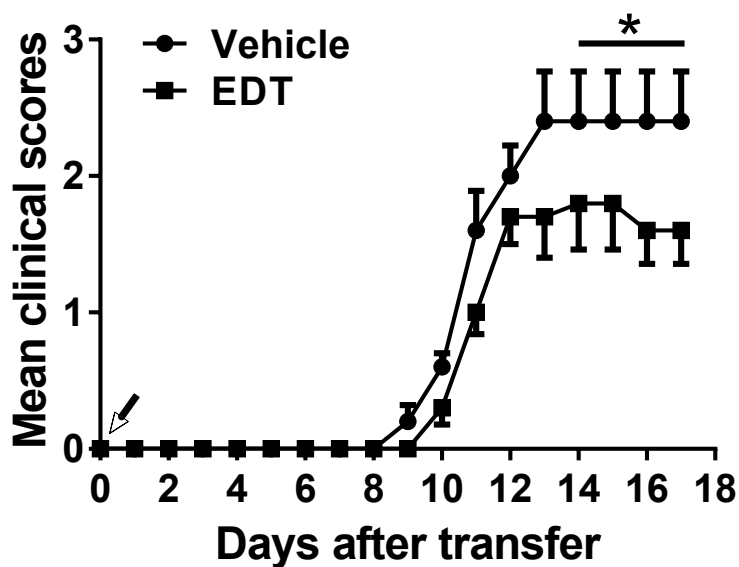

**Figure S5. EDT administration ameliorates clinical symptoms in passive EAE.** To

investigate the effect of EDT treatment on the animals after transfer of untreated cells, Vehicle or EDT (40 mg/kg/day) was administrated daily starting on day 0 post-transfer. The mean clinical score a of adoptive transfer EAE were recorded daily. Symbols represent mean  $\pm$  SEM (n = 5 each group) \*  $p < 0.05$ , determined by two-way ANOVA. One representative of three independent experiments is shown.

**Table 1**

**Primers used for real-time quantitative PCR analysis**

| Gene               | Primers                  |
|--------------------|--------------------------|
| GAPDH F            | CCAATGTGTCCGTCGTGGATCT   |
| GAPDH R            | GTTGAAGTCGCAGGAGACAACC   |
| IL-17a RT F        | TTTAACTCCCTTGGCGCAAAA    |
| IL-17a RT R        | CTTTCCTCCGCATTGACAC      |
| IL-17f RT F        | TGCTACTGTTGATGTTGGGAC    |
| IL-17f RT R        | AATGCCCTGGTTTTGGTTGAA    |
| IFN- $\gamma$ RT F | ATGAACGCTACACACTGCATC    |
| IFN- $\gamma$ RT R | CCATCCTTTTGCCAGTTCCTC    |
| GM-CSF RT F        | GTGGTCTACAGCCTCTCAGCA    |
| GM-CSF RT R        | GCATGTCATCCAGGAGGTTC     |
| IL-6 RT F          | ACACATGTTCTCTGGGAAATCGT  |
| IL-6 RT R          | AAGTGCATCATCGTTGTTCATACA |

|                     |                          |
|---------------------|--------------------------|
| IL-12p35 RT F       | CATCGATGAGCTGATGCAGT     |
| IL-12p35 RT R       | CAGATAGCCCATCACCTGT      |
| IL-23p19 RT F       | AGGTCACACTGGACCAAAGG     |
| IL-23p19 RT R       | GGCACTAAGGGCTCAGTCAG     |
| IL-1 $\beta$ RT F   | CTCTCCACCTCAATGGACAGA    |
| IL-1 $\beta$ RT R   | TGCTTGGGATCCACACTCTC     |
| TNF- $\alpha$ RT F  | GACGTGGAAGTGGCAGAAGAG    |
| TNF- $\alpha$ RT R  | GCCACAAGCAGGAATGAGAAG    |
| ROR $\gamma$ t RT F | CATCTCTGCAAGACTCATCG     |
| ROR $\gamma$ t RT R | CAGGGGATTCAACATCAGTG     |
| STAT3 RT F          | TGTGACACCATTTCATTGATGCAG |
| STAT3 RT R          | AACTCCGAGGTCAGATCCA      |

---
